# Supplementary material
Source: PubMed Central journal article supplement (PMC8934810)
Supplement: 13300_2022_1218_MOESM1_ESM.pdf [file 13300_2022_1218_MOESM1_ESM.pdf]

## Supplementary Material

### Effectiveness in real-world of once weekly semaglutide in people with type 2 diabetes glucagon-like peptide receptor agonists naïve or switchers from other glucagon-like peptide receptor agonists: results from a retrospective observational Umbria Study

Chiara Di Loreto<sup>1</sup>, Viviana Minarelli<sup>2</sup>, Giovanni Nasini<sup>3</sup>, Roberto Norgiolini<sup>2</sup>, Paola Del Sindaco<sup>1</sup>

<sup>1</sup>Diabetes Clinic - USL Umbria 1 – Perugia Territorial health structure, Italy, <sup>2</sup>Diabetes Clinic - USL Umbria 1 – Città di Castello Hospital, Italy, <sup>3</sup>Diabetes Clinic - USL Umbria 1 – Castiglione del Lago Hospital District, Italy.

Corresponding author

Chiara Di Loreto, MD

Diabetes Clinic - USL Umbria 1 – Perugia Territorial health structure, Italy

[chiara.diloreto@uslumbria1.it](mailto:chiara.diloreto@uslumbria1.it)

**Supplementary table 1:** data availability for each end-point at each visit

| <b>Visit</b>             | <b>T0</b> | <b>T6</b> | <b>T12</b> |
|--------------------------|-----------|-----------|------------|
| <b>Study end-point</b>   | <b>N</b>  | <b>N</b>  | <b>N</b>   |
| HbA1c                    | 211       | 156       | 67         |
| Waist circumference      | 120       | 101       | 40         |
| Weight                   | 203       | 150       | 62         |
| BMI                      | 202       | 148       | 59         |
| Systolic blood pressure  | 141       | 35        | 22         |
| Diastolic blood pressure | 141       | 34        | 22         |
| Total cholesterol        | 174       | 96        | 46         |
| Triglycerides            | 172       | 95        | 46         |
| HDL- cholesterol         | 170       | 92        | 46         |
| LDL- cholesterol         | 166       | 83        | 44         |
| Creatinine               | 185       | 97        | 52         |

|                  |     |     |    |
|------------------|-----|-----|----|
| eGFR             | 185 | 97  | 52 |
| Albuminuria      | 126 | 66  | 33 |
| Semaglutide dose | 216 | 172 | 70 |
